# Supplementary material for: Bayesian joint inference of hydrological and generalized error modelswith the enforcement of Total Laws
Source: Copernicus journal article supplement (doi:10.5194/hess-2017-9), 2017-01-17
Supplement: Supplementary file [file hess-2017-9-SC1-supplement.pdf]

## Supplement

Eq. (3) should be written as  $E[\underline{e}] = E[E[\underline{e}|y_s]]$ , while eq. (4) should be written as  $\underline{y} = E[\underline{y}|y_s] + \underline{\varepsilon}$ . Here we underlined random variables (Hemelrijk 1966).

Secondly from eqs. (1) and (2)

$$\underline{y} := y_s + \underline{e} \quad (1)$$

$$\underline{e} := E[\underline{e}|y_s] + \underline{\varepsilon} \quad (2)$$

we obtain

$$\underline{y} = y_s + E[\underline{e}|y_s] + \underline{\varepsilon} \Rightarrow \quad (3)$$

$$\underline{y} = y_s + E[\underline{y} - y_s|y_s] + \underline{\varepsilon} \Rightarrow \quad (4)$$

$$\underline{y} = E[\underline{y}|y_s] + \underline{\varepsilon} + y_s - y_s \quad (5)$$

which is not identical to eq. (4) of the manuscript.

Furthermore, from eq. (2) of the manuscript we obtain

$$E[\underline{\varepsilon}] = E[\underline{e}] - E[E[\underline{e}|y_s]] \Rightarrow \quad (6)$$

$$E[\underline{\varepsilon}] = E[\underline{e}] - E[\underline{e}|y_s] \Rightarrow \quad (7)$$

$$E[\underline{\varepsilon}] \neq 0 \quad (8)$$

Therefore, *n* of eq. (8) of the manuscript must be checked whether it is a standard variable. On the other hand, if we use  $\underline{y}_s$ , instead of  $y_s$  then eq. (4) of the manuscript is confirmed and  $E[\underline{\varepsilon}] = 0$ .
